# Supplementary material for: Evaluation of a New Survivin ELISA and UBC® Rapid for the Detection of Bladder Cancer in Urine
Source: PubMed Central journal article supplement (PMC5796175; doi:10.3390/ijms19010226), 2018-01-11
Supplement: ijms-19-00226-s001.pdf [file ijms-19-00226-s001.pdf]

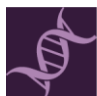

1 Article

## 2 Evaluation of a new survivin ELISA and UBC<sup>®</sup> Rapid 3 for the detection of bladder cancer in urine

4 Jan Gleichenhagen<sup>1\*</sup>, Christian Arndt<sup>2</sup>, Swaantje Casjens<sup>1</sup>, Carmen Meinig<sup>1</sup>, Holger Gerullis<sup>3</sup>,  
5 Irina Raiko<sup>1</sup>, Thomas Brüning<sup>1</sup>, Thorsten Ecke<sup>4</sup> and Georg Johnen<sup>1</sup>

6 Supplementary Materials

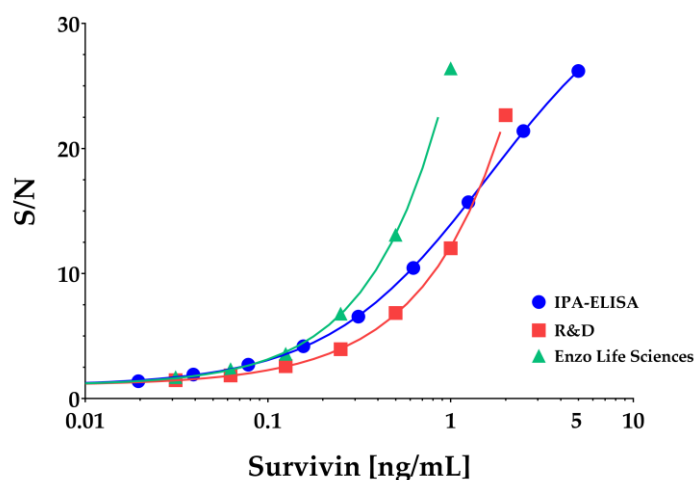

7

8 **Supplementary Figure S1.** Comparison of different survivin assays. Obtained OD values from two  
9 commercial assays (R&D, ENZO) and the new ELISA (IPA) are plotted as signal to noise ratio (S/N)  
10 and interpolated by four-parameter logistic curve fitting.

11

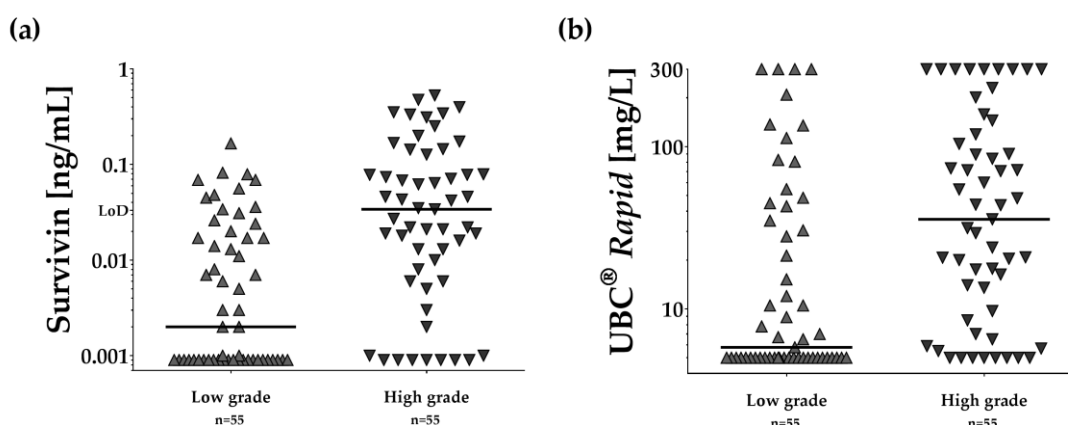

12

13 **Supplementary Figure S2.** Comparison of values for low-grade and high-grade tumors. (a) Survivin  
14 and (b) UBC<sup>®</sup> Rapid.

15

16

17

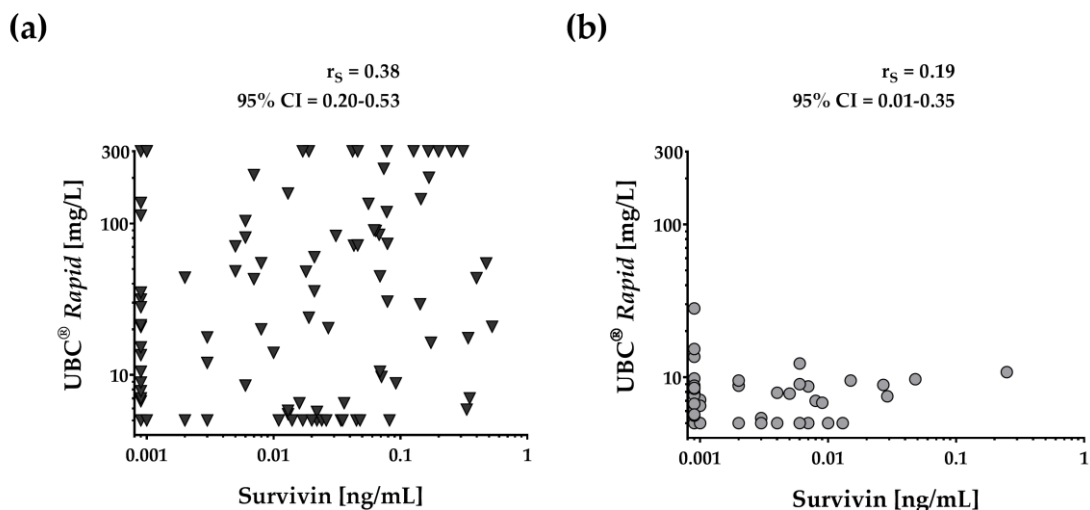

18

19 **Supplementary Figure S3.** Scatterplot of UBC® Rapid versus survivin. The plot shows marker  
 20 concentrations of the (a) tumor group ( $r_s = 0.38$ ) and (b) clinical control group ( $r_s = 0.19$ ). CI = 95%  
 21 confidence interval

22

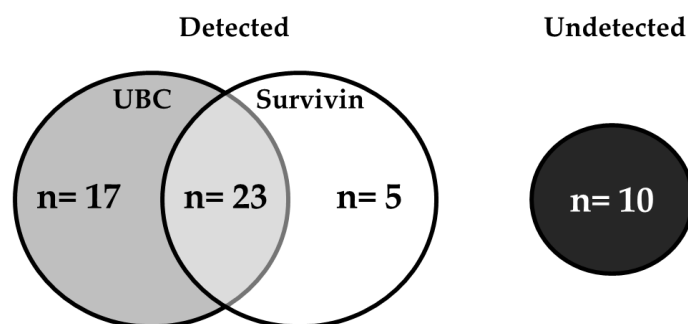

23

24 **Supplementary Figure S4.** Venn diagram of high-grade tumors. Detected (left) and undetected  
 25 (right) tumor cases by UBC® Rapid (cut-off 10 mg/l) and survivin (cut-off 0.033 ng/ml).

26

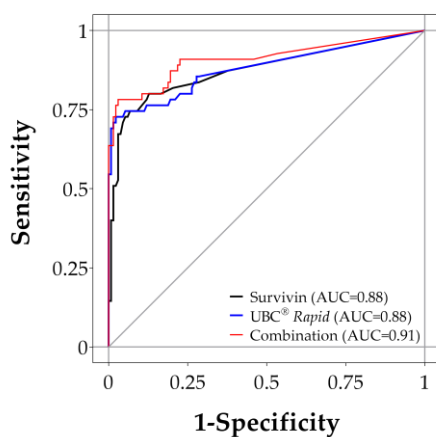

27

28 **Supplementary Figure S5.** ROC analyses of high-grade tumors and clinical controls for survivin  
 29 (AUC = 0.88), UBC® Rapid (AUC = 0.88), and the combination (AUC = 0.91).
